# Supplementary material for: Effects of Sodium Pyruvate on Vanadyl Sulphate-Induced Reactive Species Generation and Mitochondrial Destabilisation in CHO-K1 Cells
Source: MDPI journal article supplement (doi:10.3390/antiox11050909), 2022-05-05
Supplement: s1 [file s1]

Article

# Effects of sodium pyruvate on vanadyl sulphate-induced reactive species generation and mitochondrial destabilisation in CHO-K1 cells

Iwona Zwolak \* and Ewa Wnuk

Centre for Interdisciplinary Research, The John Paul II Catholic University of Lublin, Konstantynów Ave 1J, 20-708 Lublin, Poland; ewa.wnuk@kul.pl

\* Correspondence: iwona.zwolak@kul.pl; Tel.: +48-814-545-618; Fax: +48-814-454-611

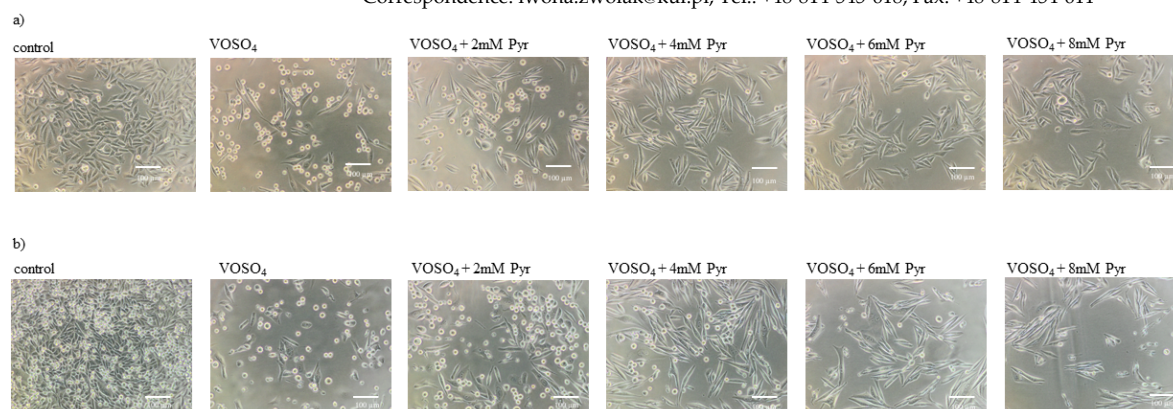

**Figure S1.** Effects of pyruvate on  $\text{VOSO}_4$ -induced changes in morphology of CHO-K1 cells under the phase-contrast microscope (bar=100  $\mu\text{M}$ ). The CHO-K1 cells were treated with 100  $\mu\text{M}$   $\text{VOSO}_4$  in the absence or presence of increasing concentrations of sodium pyruvate (Pyr) (2, 4, 6, 8 mM) for 24 h (a) or 48 h (b).

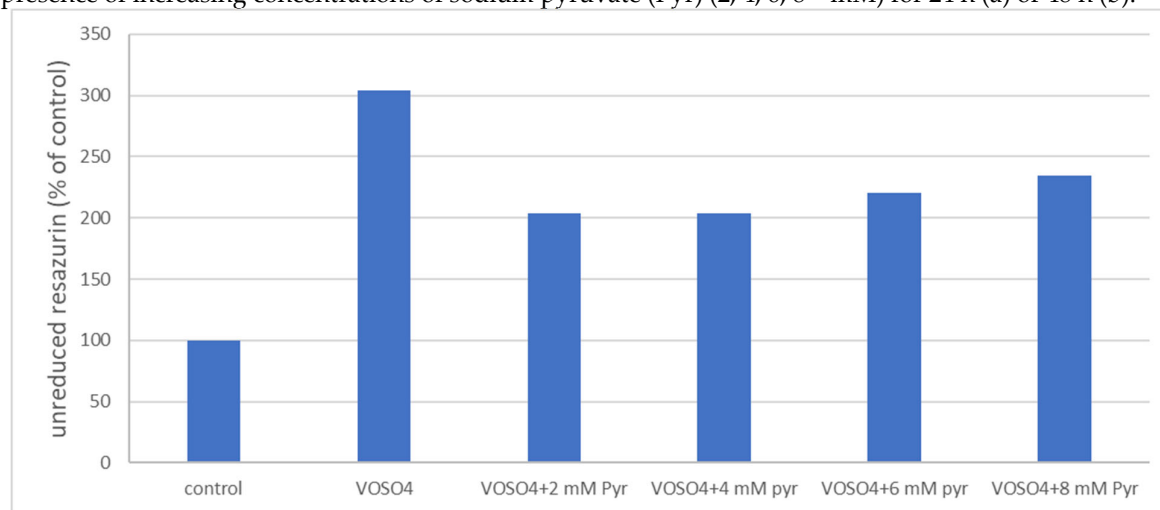

**Figure S2.** Effects of pyruvate on  $\text{VOSO}_4$ -induced cytotoxicity of CHO-K1 cells in the resazurin-based assay. The cells were incubated in DMEM/F12 medium without (control) or with 100  $\mu\text{M}$   $\text{VOSO}_4$  in the absence or presence of increasing concentrations of sodium pyruvate (Pyr) (2, 4, 6, 8 mM) for 48 h. Data represent the mean  $\pm$  SD of triplicate determinations of each data point.
